# Supplementary material
Source: HighWire-hosted journal article supplement (https://ajnr-sso.highwirestaging.com/highwire/filestream/106179/field_highwire_adjunct_files/0/0914.pdf)
Supplement: 0914.pdf [file 0914.pdf]

**Table 1. Summary of included PET studies from 1997-2022**

| <b>Published PET Study</b> | <b>Drug Administered</b> | <b>Method of Analysis</b>                    | <b>Type of Imaging</b>                          | <b>Time Elapsed Between Drug and/or Placebo Administration and Scan</b>                                                   | <b>Principal Findings</b>                                                                                                                                                       |
|----------------------------|--------------------------|----------------------------------------------|-------------------------------------------------|---------------------------------------------------------------------------------------------------------------------------|---------------------------------------------------------------------------------------------------------------------------------------------------------------------------------|
| Vollenweider et al (1997)  | Psilocybin               | ROIs chosen from Talairach coordinate system | $^{18}\text{F}$ -FDG PET, an isotope of glucose | Baseline scan, then scan with radiotracer administered 90 minutes after drug ingestion, with a month between each session | Increase in cerebral glucose metabolism in frontomedial, frontotemporal, temporomedial and anterior cingulate cortices and thalamus. This demonstrates a hyper frontal pattern. |

|                                    |            |                                                           |                                                                   |                                                                                                                         |                                                                                                                                                                            |
|------------------------------------|------------|-----------------------------------------------------------|-------------------------------------------------------------------|-------------------------------------------------------------------------------------------------------------------------|----------------------------------------------------------------------------------------------------------------------------------------------------------------------------|
| Vollenweider et al<br>(1999)       | Psilocybin | ROIs with high tracer activity in cerebellum and striatum | <sup>11</sup> [C]-Raclopride PET, a D <sub>2</sub> R antagonist   | Radiotracer and scan administered 80 minutes after drug (and placebo) ingestion, with one month between each session    | Binding decreased at D <sub>2</sub> receptor in striatum. Psilocybin has direct effect on endogenous dopamine release.                                                     |
| Gouzoulis-Mayfrank et al<br>(1999) | Psilocybin | ROIs of whole brain                                       | <sup>18</sup> [F]-FDG PET, a glucose isotope Word activation task | Scans started 110-120 minutes after drug or placebo ingestion, repeated 2-4 weeks later with activation or control task | Increase in glucose metabolism at right frontotemporal regions and anterior cingulate cortex. Decrease in glucose metabolism in right thalamus and left precentral region. |

|                     |            |                                            |                                                                     |                                                                                                                       |                                                                                                                                                                                |
|---------------------|------------|--------------------------------------------|---------------------------------------------------------------------|-----------------------------------------------------------------------------------------------------------------------|--------------------------------------------------------------------------------------------------------------------------------------------------------------------------------|
| Hasler et al (2009) | Psilocybin | Distribution volume in whole brain         | <sup>18</sup> [F]-Altanserin PET, a 5-HT <sub>2A</sub> R antagonist | Radiotracer and scan administered 75 min after drug (and placebo) administration, with two weeks between each session | Psilocybin competed for receptor occupancy in frontomedial regions, the insula and anterior cingulate cortex.                                                                  |
| Madsen et al (2019) | Psilocybin | Simplified reference tissue model and ROIs | <sup>11</sup> [C]-Cimbi-36 PET, a 5-HT <sub>2A</sub> R agonist      | Scan started one hour after drug (and placebo) administration, with a week between each session                       | Dose-dependent occupancy of 5-HT <sub>2A</sub> receptors in neocortex. High interindividual variability in dose response curves, correlated with psilocin concentration level. |

|                                                                                     |            |                                                      |                                                                |                                                         |                                                                                                                                                                           |
|-------------------------------------------------------------------------------------|------------|------------------------------------------------------|----------------------------------------------------------------|---------------------------------------------------------|---------------------------------------------------------------------------------------------------------------------------------------------------------------------------|
| <sup>a</sup> McCulloch et al<br>(2022)<br><br><i>Data from Madsen et al. (2020)</i> | Psilocybin | Neocortical and cerebellar ROIs                      | <sup>11</sup> [C]-Cimbi-36 PET, a 5-HT <sub>2A</sub> R agonist | Scan at baseline and 1 week after drug administration   | Change in binding of 5-HT <sub>2A</sub> receptor from baseline to one week after psilocybin reflective of resting state changes at 3 months in executive control network. |
| Sondegaard et al<br>(2022)                                                          | Psilocybin | Linear regression model using ROI binding potentials | <sup>11</sup> [C]-Cimbi-36 PET, a 5-HT <sub>2A</sub> R agonist | Scan at baseline then for 120 min after tracer injected | Negative association between mindfulness at 3 months and right amygdala 5-HT <sub>2A</sub> receptor binding.                                                              |

**Notes:** <sup>a</sup>This manuscript includes both PET and fMRI analyses in its experimental design. The word activation task (Gouzoulis-Mayfrank et al., 1999) involved a control task (repeating stimulus word) and activation task (associating one word to every stimulus) during the PET scan.

**Table 2. Summary of included functional MRI studies from 2012-2023**

| <b>Published fMRI Study</b> | <b>Drug Administered</b> | <b>Method of Analysis</b> | <b>Type of Imaging</b>            | <b>Time Elapsed Between Drug and/or Placebo Administration and Scan</b>                         | <b>Principal Findings</b>                                                                                                                                                                                                      |
|-----------------------------|--------------------------|---------------------------|-----------------------------------|-------------------------------------------------------------------------------------------------|--------------------------------------------------------------------------------------------------------------------------------------------------------------------------------------------------------------------------------|
| Carhart-Harris et al (2012) | Psilocybin               | Ventromedial PFC ROI      | Resting-state fMRI<br>Eyes closed | Scan started 6 min before drug (and placebo) administration, with one week between each session | Decreased coupling between posterior cingulate cortex and medial PFC, decreases in medial PFC, ventral posterior cingulate cortex, putamen and subthalamic nuclei.<br><br>Reduced resting state functional connectivity in the |

|                                              |            |                                       |                                   |                                                                                                 |                                                                                                                                                  |
|----------------------------------------------|------------|---------------------------------------|-----------------------------------|-------------------------------------------------------------------------------------------------|--------------------------------------------------------------------------------------------------------------------------------------------------|
|                                              |            |                                       |                                   |                                                                                                 | anterior cingulate cortex and medial PFC.                                                                                                        |
| Carhart-Harris et al (2013)                  | Psilocybin | Independent component analysis of DMN | Resting-state fMRI<br>Eyes closed | Scan started 6 min before drug (and placebo) administration, with one week between each session | Increased connectivity between DMN and task positive network, and between thalamus and task positive network.                                    |
| <i>Data from Carhart-Harris et al (2012)</i> |            |                                       |                                   |                                                                                                 |                                                                                                                                                  |
| Tagliazucchi et al (2014)                    | Psilocybin | Voxel-wise distribution               | Resting-state fMRI<br>Eyes closed | Scan started 6 min before drug (and placebo) administration, with one week between each session | Increased signaling variation in hippocampi and anterior cingulate cortex.<br><br>Decrease signaling in executive control and attention network. |
| <i>Data from Carhart-Harris et al (2012)</i> |            |                                       |                                   |                                                                                                 |                                                                                                                                                  |

|                                                                               |            |                                                        |                                                    |                                                                                                                              |                                                                                                                                           |
|-------------------------------------------------------------------------------|------------|--------------------------------------------------------|----------------------------------------------------|------------------------------------------------------------------------------------------------------------------------------|-------------------------------------------------------------------------------------------------------------------------------------------|
| Kraehenmann et al<br>(2014)                                                   | Psilocybin | General linear<br>model and<br>ROIs of<br>amygdala     | Task-based fMRI<br><br>Amygdala reactivity<br>task | Scans started 70<br>to 90 min after<br>drug (and<br>placebo)<br>administration,<br>with two weeks<br>between each<br>session | Decrease in right amygdala<br>activation after exposure to<br>negative and neutral facial<br>expressions.                                 |
| Roseman et al (2014)<br><br><i>Data from Carhart-<br/>Harris et al (2012)</i> | Psilocybin | Independent<br>component<br>analysis of<br>whole brain | Resting-state fMRI<br><br>Eyes closed              | Scan started 6<br>min before drug<br>(and placebo)<br>administration,<br>with one week<br>between each<br>session            | Decreased coupling between<br>visual and sensorimotor<br>network.<br><br>Increased coupling between<br>network resting state<br>networks. |

|                                           |            |                                             |                                             |                                                                                                         |                                                                                                                                                                                            |
|-------------------------------------------|------------|---------------------------------------------|---------------------------------------------|---------------------------------------------------------------------------------------------------------|--------------------------------------------------------------------------------------------------------------------------------------------------------------------------------------------|
| Kraehenmann et al (2015)                  | Psilocybin | Dynamic causal modeling and network ROIs    | Task-based fMRI<br>Amygdala reactivity task | Scans started 70 to 90 min after drug (and placebo) administration, with two weeks between each session | Decreased connectivity between amygdala and primary visual cortex (area V1), preventing processing of negative visual stimulus.                                                            |
| <i>Data from Kraehenmann et al (2014)</i> |            |                                             |                                             |                                                                                                         |                                                                                                                                                                                            |
| Lebedev et al (2015)                      | Psilocybin | Clustering coefficients of whole brain ROIs | Resting-state fMRI<br>Eyes closed           | Scan started 6 minutes before drug (and placebo) administration                                         | Decreased FC between medial temporal lobe and parietal lobes. Decreased integrity of salience network and inter-hemispheric connectivity. These decreases corresponded to ego-dissolution. |



|                             |            |                                                        |                                   |                                                                                                   |                                                                                                                                                                                                                                                                                                                     |
|-----------------------------|------------|--------------------------------------------------------|-----------------------------------|---------------------------------------------------------------------------------------------------|---------------------------------------------------------------------------------------------------------------------------------------------------------------------------------------------------------------------------------------------------------------------------------------------------------------------|
| Preller et al (2016)        | Psilocybin | Small-volume correction of ROIs                        | Task-based fMRI<br>Cyberball task | Scan and task started 75 min after drug administration                                            | Decreased neural response in the dorsal anterior cingulate cortex and middle frontal gyrus.                                                                                                                                                                                                                         |
| Carhart-Harris et al (2016) | LSD        | Seed-based analysis and independent component analysis | Resting-state fMRI<br>Eyes closed | Scan performed 70 min after drug (and placebo) administration with two weeks between each session | Increased resting-state FC between primary visual cortex and (sub)cortical regions, between parahippocampus and dorsal medial PFC, between ventromedial PFC, caudate and inferior frontal gyrus.<br><br>Decreased resting-state FC between parahippocampus and retrosplenial cortex and posterior cingulate cortex. |

|                                              |     |                                            |                                   |                                                                                                   |                                                                                                                                                                                                                          |
|----------------------------------------------|-----|--------------------------------------------|-----------------------------------|---------------------------------------------------------------------------------------------------|--------------------------------------------------------------------------------------------------------------------------------------------------------------------------------------------------------------------------|
| Tagliazucchi et al (2016)                    | LSD | Functional connectivity density of ROIs    | Resting-state fMRI<br>Eyes closed | Scan performed 70 min after drug (and placebo) administration with two weeks between each session | Increased global connections between thalamus and primary sensory cortex.<br>Increased coupling between association and sensory networks.<br>Increased global FC in areas with high 5-HT <sub>2A</sub> receptor density. |
| <i>Data from Carhart-Harris et al (2016)</i> |     |                                            |                                   |                                                                                                   |                                                                                                                                                                                                                          |
| Müller et al (2017)                          | LSD | ROI-to-ROI and ROI-to-voxel of whole brain | Resting-state fMRI<br>Eyes closed | Scan started 2.5h after drug (and placebo) administration, with a week between each session       | Increased functional connectivity between thalamus, right fusiform gyrus and insula. Overall increased connectivity of thalamus and striatum.                                                                            |

|                                           |            |                            |                                             |                                                                                                      |                                                                                                                                                                    |
|-------------------------------------------|------------|----------------------------|---------------------------------------------|------------------------------------------------------------------------------------------------------|--------------------------------------------------------------------------------------------------------------------------------------------------------------------|
|                                           |            |                            |                                             |                                                                                                      | Explains intense sensory and visual effects.                                                                                                                       |
| Mueller et al (2017)                      | LSD        | ROI-based voxel clusters   | Task-based fMRI<br>Facial expression task   | Scan started 2.5h after drug or placebo administration, with one week between each session           | Decreased response in left amygdala and right medial PFC during fearful faces (fear stimulus). Increased subjective effects linked to decreased amygdala response. |
| Grimm et al (2018)                        | Psilocybin | Seed-to-voxel connectivity | Task-based fMRI<br>Amygdala reactivity task | Scans started 70 to 90 min after drug or placebo administration, with two weeks between each session | Decreased connectivity between right amygdala and left striatum (angry face) and between amygdala and frontal pole decreased.                                      |
| <i>Data from Kraehenmann et al (2014)</i> |            |                            |                                             |                                                                                                      |                                                                                                                                                                    |

|                      |            |                                                      |                                   |                                                                                            |                                                                                                                                                                                                                                  |
|----------------------|------------|------------------------------------------------------|-----------------------------------|--------------------------------------------------------------------------------------------|----------------------------------------------------------------------------------------------------------------------------------------------------------------------------------------------------------------------------------|
| Preller et al (2018) | LSD        | ROI-to-ROI<br>global brain<br>connectivity           | Resting-state fMRI<br>Eyes closed | Scan started 75<br>and 300 min after<br>drug or placebo<br>administration                  | Increased connectivity<br>from thalamus to posterior<br>cingulate cortex.<br><br>Decreased connectivity from<br>ventral striatum to thalamus.<br><br>Both dependent on 5-HT <sub>2A</sub><br>receptor activation.                |
| Barrett et al (2020) | Psilocybin | Independent<br>component<br>analysis of<br>claustrum | Resting-state fMRI<br>Eyes closed | Scans started 90<br>min after drug<br>(and placebo)<br>administration,<br>both on same day | Decreased connectivity<br>between right claustrum and<br>DMN. Increased connectivity<br>of right claustrum-fronto-<br>parietal task network.<br><br>Decreased connectivity of left<br>claustrum-fronto-parietal task<br>network. |

|                      |            |                                                     |                                                                                             |                                                                                                 |                                                                                                                                                           |
|----------------------|------------|-----------------------------------------------------|---------------------------------------------------------------------------------------------|-------------------------------------------------------------------------------------------------|-----------------------------------------------------------------------------------------------------------------------------------------------------------|
|                      |            |                                                     |                                                                                             |                                                                                                 | Significant effect of 5-HT <sub>2A</sub> receptor signaling on claustrum function.                                                                        |
| Barrett et al (2020) | Psilocybin | ROI analysis of amygdala, anterior cingulate cortex | Resting-state and task-based fMRI<br>Emotion conflict, recognition, and discrimination task | First scan one day before drug administration then follow-up scans one week and one month after | Decreased emotional response in left anterior cingulate cortex, right and left amygdala up to one month later.                                            |
| Bershad et al (2020) | LSD        | Seed based ROI of amygdala                          | Resting-state fMRI                                                                          | Scans started 90 min after drug (and placebo) administration, with one week                     | Decreased connectivity from amygdala and bilateral postcentral gyrus and superior temporal gyrus.<br>Increased connections from amygdala to right angular |

|                      |            |                                       |                                                       |                                                                                                               |                                                                                                                                                                                  |
|----------------------|------------|---------------------------------------|-------------------------------------------------------|---------------------------------------------------------------------------------------------------------------|----------------------------------------------------------------------------------------------------------------------------------------------------------------------------------|
|                      |            |                                       |                                                       | between each session                                                                                          | gyrus, middle frontal gyrus and cerebellum.<br><br>Increased connectivity of thalamus to cerebellum.                                                                             |
| Preller et al (2020) | Psilocybin | Voxel-based global brain connectivity | Resting-state fMRI<br><br>Eyes closed                 | Scans started 20, 40, and 70 min after drug (and placebo) administration, with two weeks between each session | Reduction in connectivity at associative regions.<br><br>Increase in connectivity at sensory regions.<br><br>5-HT <sub>1A</sub> R expressed baseline readout indicates response. |
| Mason et al (2020)   | Psilocybin | Independent component analysis of     | Resting-state fMRI<br><br>Eyes open, focused on cross | Scan started 102 min after drug or placebo administration                                                     | Overall increase of between-network functional connectivity. Increased connectivity between the                                                                                  |

|                                     |            |                               |                                   |                                                                                          |                                                                                                                                                                                                                                                     |
|-------------------------------------|------------|-------------------------------|-----------------------------------|------------------------------------------------------------------------------------------|-----------------------------------------------------------------------------------------------------------------------------------------------------------------------------------------------------------------------------------------------------|
|                                     |            | resting-state<br>networks     |                                   |                                                                                          | DMN and the frontoparietal<br>network and salience<br>networks.                                                                                                                                                                                     |
| Madsen et al (2021)                 | Psilocybin | Region-based<br>network pairs | Resting-state fMRI<br>Eyes closed | Baseline scan<br>performed, then<br>40, 80, 130, 300<br>min after drug<br>administration | 5-HT <sub>2A</sub> receptor agonism<br>induces desynchrony of<br>executive control and attention<br>networks, that connect to other<br>networks in the brain. Plasma<br>psilocin level negatively<br>correlated with level of<br>network integrity. |
| <sup>a</sup> McCulloch et al (2022) | Psilocybin | ROI network                   | Resting-state fMRI<br>Eyes closed | First scan at<br>baseline, then 1<br>week and 3<br>months after drug<br>administration   | Decrease in executive control<br>network FC at 1 week<br>reflective of subjective<br>personality changes at 3<br>months.                                                                                                                            |

|                                                               |            |                                             |                                   |                                                                                                               |                                                                                                                                                                                                                   |
|---------------------------------------------------------------|------------|---------------------------------------------|-----------------------------------|---------------------------------------------------------------------------------------------------------------|-------------------------------------------------------------------------------------------------------------------------------------------------------------------------------------------------------------------|
| Gaddis et al (2022)                                           | Psilocybin | Independent component analysis of thalamus  | Resting-state fMRI<br>Eyes closed | First scan at baseline, second scan 2-4 months later, starting 90 min after drug (and placebo) administration | Overall decrease in connectivity between thalamocortical pathway and visual and default mode networks.                                                                                                            |
| Avram et al (2022)<br><br><i>Data from Holze et al (2020)</i> | LSD        | Seed-based correlation analysis of thalamus | Resting-state fMRI<br>Eyes closed | Scan began 2.5 hours after drug or placebo administration                                                     | Increased thalamic self-inhibition between left auditory cortex and right lingual cortex and connectivity between right lingual gyrus and thalamus.<br><br>Decreased self-inhibition in right postcentral cortex. |



|                      |     |                                  |                                   |                                                                  |                                                                                                                                                                                                                                                              |
|----------------------|-----|----------------------------------|-----------------------------------|------------------------------------------------------------------|--------------------------------------------------------------------------------------------------------------------------------------------------------------------------------------------------------------------------------------------------------------|
|                      |     |                                  |                                   |                                                                  | Decreased effective connectivity between left auditory cortex, right postcentral cortex and thalamus.                                                                                                                                                        |
| Moujaes et al (2023) | LSD | ROI-to-ROI connectivity matrices | Resting-state fMRI<br>Eyes closed | Scan started 75 and 300 min after drug or placebo administration | Increased connectivity in frontoparietal, somato-motor, right lingual, primary visual and dorsal attention networks, and inferior temporal gyrus.<br><br>Decreased connectivity in salience, auditory and default mode networks and inferior temporal gyrus. |

|                                              |            |                                                |                                   |                                                                                                         |                                                                                                                                                                                                                                                                                                                          |
|----------------------------------------------|------------|------------------------------------------------|-----------------------------------|---------------------------------------------------------------------------------------------------------|--------------------------------------------------------------------------------------------------------------------------------------------------------------------------------------------------------------------------------------------------------------------------------------------------------------------------|
| Moujaes et al (2023)                         | Psilocybin | Voxel-based global brain connectivity          | Resting-state fMRI<br>Eyes closed | Scans began 20, 40, 70 min after drug (and placebo) administration, with two weeks between each session | Increased FC between dorsal attention, primary visual and auditory networks, superior lateral occipital cortex and superior temporal gyrus.<br><br>Decreased connectivity in DMN, frontoparietal network, superior temporal gyrus, auditory, salience networks and cerebellum and primary and secondary visual networks. |
| <i>Data from Preller et al (2020)</i>        |            |                                                |                                   |                                                                                                         |                                                                                                                                                                                                                                                                                                                          |
| Pizzi et al (2023)                           | LSD        | Voxel-based z scores of intrinsic connectivity | Resting-state fMRI<br>Eyes closed | Scan began 2 hours after drug (and placebo) administration, at                                          | Increased FC in DMN and attention networks that correspond to high density of 5-HT <sub>2A</sub> receptors.                                                                                                                                                                                                              |
| <i>Data from Carhart-Harris et al (2016)</i> |            |                                                |                                   |                                                                                                         |                                                                                                                                                                                                                                                                                                                          |

|                                                                                               |     |                                       |                                   |                                                                                                  |                                                                                                                                                                                             |
|-----------------------------------------------------------------------------------------------|-----|---------------------------------------|-----------------------------------|--------------------------------------------------------------------------------------------------|---------------------------------------------------------------------------------------------------------------------------------------------------------------------------------------------|
|                                                                                               |     |                                       |                                   | least two weeks<br>between each<br>session                                                       | Decreased FC in limbic<br>regions that correspond to high<br>density of 5-HT <sub>1A</sub> receptors.                                                                                       |
| Bedford et al (2023)<br><br><i>Data from Müller et al<br/>(2018), Dolder et al<br/>(2016)</i> | LSD | Whole brain<br>network of all<br>ROIs | Resting-state fMRI<br>Eyes closed | Scan started 121-<br>200 min after<br>drug (and<br>placebo)<br>administration,<br>one week apart | Increased interregional<br>connectivity and reduced local<br>connectivity in occipital and<br>subcortical regions.<br>Direction of connectivity was<br>changed upon drug<br>administration. |
| Timmermann et al (2023)                                                                       | DMT | Voxel-based<br>connectivity<br>matrix | Resting-state fMRI<br>Eyes closed | Scan starts 8<br>minutes prior to<br>drug (and<br>placebo)<br>administration,<br>with two weeks  | Decreased integrity of<br>connections within global and<br>language-associated networks.<br>Decreased segregation in<br>frontoparietal, salience and<br>default mode networks.              |

|  |                      |                                                                                                                                                         |
|--|----------------------|---------------------------------------------------------------------------------------------------------------------------------------------------------|
|  | between each session | Increase in global FC in frontoparietal, salience, default mode networks.<br><br>Hyper-connectivity of association pole and overall global FC increase. |
|--|----------------------|---------------------------------------------------------------------------------------------------------------------------------------------------------|

**Notes:** <sup>a</sup>This manuscript includes both PET and fMRI analyses in its experimental design. The amygdala reactivity task (Kraehenmann et al., 2014, 2015) involves exposing the participant to a negative or neutral picture and having them select from two others, the image that best matches. The Cyberball task (Preller et al., 2016) involves the participant playing a video game that models social exclusion. The facial expression task (Mueller et al., 2017) involves exposing the participant to 10 different facial affects that demonstrate 50 or 100% fearful or neutral expression, and having the participant categorize the faces by gender. The amygdala reactivity task (Grimm et al., 2018) involves asking the participant to categorize an angry, happy, or neutral expression as ‘emotional’ or ‘neutral’ as quickly as possible. The emotional tasks (Barrett et al., 2020) involve matching one of two images at the bottom of a screen to a fearful or angry image in the center, identifying happy, sad, fearful, angry or neutral facial expressions, and identifying valence of facial expressions with emotional words. LSD= lysergic acid diethylamide; DMT= N, N-Dimethyltryptamine; DMN: default mode network; PFC= prefrontal cortex; FC= functional connectivity.

**Table 3. Summary of Study Design, Drug Information and Demographics in PET Studies**

| <b>Published PET Study</b> | <b>Psychedelic Administered</b> | <b>Study Design</b>                                     | <b>Total N</b><br><b>Female N</b> | <b>Dose Amount</b><br><b>(mg/kg)</b> | <b>Method of Administration</b><br><b>(IV, Oral)</b> | <b>Psychedelic-naïve/ Handedness</b>                              |
|----------------------------|---------------------------------|---------------------------------------------------------|-----------------------------------|--------------------------------------|------------------------------------------------------|-------------------------------------------------------------------|
| Vollenweider et al (1997)  | Psilocybin                      | Open label without control group                        | N=10<br>Female N=2                | 15-20mg                              | oral                                                 | Treatment-naïve status not provided/<br>Handedness not considered |
| Vollenweider et al (1999)  | Psilocybin                      | Randomized, single-blind, placebo-controlled cross over | N=7<br>Female N=0                 | 0.25mg/kg                            | oral                                                 | Treatment-naïve status not provided/<br>Handedness not considered |

|                                     |            |                                                          |                     |              |      |                                                                   |
|-------------------------------------|------------|----------------------------------------------------------|---------------------|--------------|------|-------------------------------------------------------------------|
| Gouzoulis-Mayfrank et al (1999)     | Psilocybin | Randomized, double-blind, placebo-controlled, cross over | N=32<br>Female N=11 | 0.2mg/kg     | oral | Treatment-naïve status not provided/<br>Handedness not considered |
| Hasler et al (2009)                 | Psilocybin | Within-subjects, placebo-controlled                      | N=11<br>Female N=0  | 215µg/kg     | oral | Treatment-naïve status not provided/<br>Handedness not considered |
| Madsen et al (2019)                 | Psilocybin | Single-blinded                                           | N=8<br>Female N=3   | 3-30mg       | oral | Not naïve/<br>Handedness not considered                           |
| <sup>a</sup> McCulloch et al (2021) | Psilocybin | Single-blinded                                           | N=10<br>Female N=4  | 0.2-0.3mg/kg | oral | Naïve/<br>Handedness not considered                               |

|                          |            |                                                    |                                  |                           |      |                                                                   |
|--------------------------|------------|----------------------------------------------------|----------------------------------|---------------------------|------|-------------------------------------------------------------------|
| Sondergaard et al (2022) | Psilocybin | Randomized, double-blind placebo-controlled design | N=32<br><sup>b</sup> Female N=17 | 0.21mg/kg or<br>0.31mg/kg | oral | Treatment-naïve status not provided/<br>Handedness not considered |
|--------------------------|------------|----------------------------------------------------|----------------------------------|---------------------------|------|-------------------------------------------------------------------|

**Notes:** <sup>a</sup>This manuscript includes both PET and fMRI analyses in its experimental design. <sup>b</sup>This value is taken from total psilocybin interventions, N=46. Mostly naïve: some participants had previous use of psychedelics, creating a mix of naïve and non-naïve individuals; Not naïve: participants had previous use of psychedelics, but not within three months of study date.

**Table 4. Summary of Study Design, Drug Information and Demographics in fMRI Studies**

| <b>Published<br/>fMRI Study</b> | <b>Psychedelic<br/>Administered</b> | <b>Study Design</b>                       | <b>Total N<br/><br/>Female N</b> | <b>Dose<br/><br/>Amount<br/><br/>(mg/kg,<br/>mg, or µg)</b> | <b>Method of<br/>Administration<br/><br/>(IV, Oral)</b> | <b>Psychedelic-<br/>naïve/<br/><br/>Handedness</b> |
|---------------------------------|-------------------------------------|-------------------------------------------|----------------------------------|-------------------------------------------------------------|---------------------------------------------------------|----------------------------------------------------|
| Carhart-Harris<br>et al (2012)  | Psilocybin                          | Within-subjects<br><br>placebo-controlled | N=15<br><br>Female N=2           | 2mg                                                         | IV                                                      | Not naïve/<br><br>Handedness<br><br>not considered |
| Carhart-Harris<br>et al (2013)  | Psilocybin                          | Within-subjects<br><br>placebo-controlled | N=15<br><br>Female N=2           | 2mg                                                         | IV                                                      | Not naïve/<br><br>Handedness<br><br>not considered |
| Tagliazucchi et<br>al (2014)    | Psilocybin                          | Within-subjects<br><br>placebo-controlled | N=15<br><br>Female N=2           | 2mg                                                         | IV                                                      | Not naïve/<br><br>Handedness<br><br>not considered |



|                          |            |                                                            |                     |            |      |                                                         |
|--------------------------|------------|------------------------------------------------------------|---------------------|------------|------|---------------------------------------------------------|
| Kraehenmann et al (2014) | Psilocybin | Randomized, double-blind, placebo-controlled, cross over   | N= 25<br>Female N=9 | 0.16mg/kg  | oral | Mostly naïve/<br>Right-handed                           |
| Roseman et al (2014)     | Psilocybin | Within-subjects placebo-controlled                         | N=15<br>Female N=2  | 2mg        | IV   | Not naïve/<br>Handedness<br>not considered              |
| Kraehenmann et al (2015) | Psilocybin | Randomized, double-blind, placebo-controlled, cross over   | N= 25<br>Female N=9 | 0.16mg/kg  | oral | Mostly naïve/<br>Right-handed                           |
| Lebedev et al (2015)     | Psilocybin | Within-subjects, counterbalanced-order, placebo-controlled | N= 15<br>Female N=2 | 2mg        | IV   | Not naïve/<br>Handedness<br>not considered              |
| Preller et al (2016)     | Psilocybin | Randomized, double-blind counterbalanced cross-over        | N=21<br>Female N=9  | 0.215mg/kg | oral | Treatment-naïve status<br>not provided/<br>Right-handed |

|                                |     |                                                                                       |                     |       |      |                                            |
|--------------------------------|-----|---------------------------------------------------------------------------------------|---------------------|-------|------|--------------------------------------------|
| Carhart-Harris<br>et al (2016) | LSD | Within-subjects,<br>placebo-controlled<br>counterbalanced                             | N=15<br>Female N=4  | 75µg  | IV   | Not naïve/<br>Handedness<br>not considered |
| Tagliazucchi et<br>al (2016)   | LSD | Within-subjects,<br>placebo-controlled<br>counterbalanced                             | N=15<br>Female N=4  | 75µg  | IV   | Not naïve/<br>Handedness<br>not considered |
| Müller et al<br>(2017)         | LSD | Randomized, placebo-<br>controlled, double-<br>blind crossover design<br>with placebo | N=20<br>Female N=10 | 100µg | oral | Mostly naïve/<br>Right-handed              |
| Mueller et al<br>(2017)        | LSD | Randomized, placebo-<br>controlled, double-<br>blind crossover design<br>with placebo | N=20<br>Female N=11 | 100µg | oral | Mostly naïve/<br>Right-handed              |

|                         |            |                                                                  |                     |           |      |                                            |
|-------------------------|------------|------------------------------------------------------------------|---------------------|-----------|------|--------------------------------------------|
| Grimm et al<br>(2018)   | Psilocybin | Randomized, double-blind placebo-controlled design               | N=18<br>Female N=6  | 0.16mg/kg | oral | Mostly naïve/<br>Right-handed              |
| Preller et al<br>(2018) | LSD        | Double-blinded, randomized, crossover design, placebo-controlled | N=24<br>Female N=5  | 100µg     | oral | Mostly naïve/<br>Right-handed              |
| Barrett et al<br>(2020) | Psilocybin | Single-blinded, placebo-controlled                               | N=15<br>Female N=5  | 10mg/70kg | oral | Not naïve/<br>Handedness<br>not considered |
| Barrett et al<br>(2020) | Psilocybin | Open-label, within-subjects, longitudinal                        | N=12<br>Female N=7  | 25mg/70kg | oral | Not naïve/<br>Right-handed                 |
| Bershad et al<br>(2020) | LSD        | Within-subject, double-blind design with placebo                 | N=20<br>Female N=10 | 13µg      | oral | Not naïve/<br>Right-handed                 |

|                                        |            |                                                                           |                         |                                                     |      |                                                       |
|----------------------------------------|------------|---------------------------------------------------------------------------|-------------------------|-----------------------------------------------------|------|-------------------------------------------------------|
| Preller et al<br>(2020)                | Psilocybin | Double-blinded,<br>randomized, placebo-<br>controlled crossover<br>design | N=23<br><br>Female N=11 | 0.2mg/kg                                            | oral | Mostly naïve/<br><br>Handedness<br><br>not considered |
| Mason et al<br>(2020)                  | Psilocybin | Double-blind, placebo-<br>controlled, parallel-<br>group design           | N=60<br><br>Female N=25 | 0.17mg/kg                                           | oral | Not naïve/<br><br>Handedness<br><br>not considered    |
| Madsen et al<br>(2021)                 | Psilocybin | Single-blind design<br>with placebo                                       | N=15<br><br>Female N=6  | 0.2mg/kg<br><br>(N=4)<br><br>0.3mg/kg<br><br>(N=11) | oral | Mostly naïve/<br><br>Handedness<br><br>not considered |
| <sup>a</sup> McCulloch et<br>al (2021) | Psilocybin | Within-subjects, single-<br>blinded                                       | N=10<br><br>Female N=4  | 0.2mg/kg<br><br>(N=4)<br><br>0.3mg/kg<br><br>(N=6)  | oral | Naïve/<br><br>Handedness<br><br>not considered        |

|                         |            |                                                                            |                     |           |      |                                               |
|-------------------------|------------|----------------------------------------------------------------------------|---------------------|-----------|------|-----------------------------------------------|
| Gaddis et al<br>(2022)  | Psilocybin | Randomized, double-blind placebo-controlled design                         | N=18<br>Female N=5  | 10mg/70kg | oral | Mostly naïve/<br>Handedness<br>not considered |
| Avram et al<br>(2023)   | LSD        | Double-blind placebo-controlled crossover design                           | N=25<br>Female N=12 | 100µg     | oral | Mostly naïve/<br>Handedness<br>not considered |
| Moujaes et al<br>(2023) | LSD        | Randomized, placebo-controlled, double-blind crossover design with placebo | N=24<br>Female N=6  | 100µg     | oral | Mostly naïve/<br>Right-handed                 |
| Moujaes et al<br>(2023) | Psilocybin | Double-blinded, randomized, placebo-controlled crossover design            | N=23<br>Female N=10 | 0.2mg/kg  | oral | Mostly naïve/<br>Handedness<br>not considered |
| Pizzi et al<br>(2023)   | LSD        | Randomized, placebo-controlled, double-                                    | N=15                | 75µg      | IV   | Mostly naïve/<br>Right-handed                 |

|                            |     |                                                                       |                     |       |      |                                               |
|----------------------------|-----|-----------------------------------------------------------------------|---------------------|-------|------|-----------------------------------------------|
|                            |     | blind crossover design<br>with placebo                                | Female N=4          |       |      |                                               |
| Bedford et al<br>(2023)    | LSD | Randomized, placebo-<br>controlled, double-<br>blind crossover design | N=45<br>Female N=23 | 100µg | oral | Mostly naïve/<br>Handedness<br>not considered |
| Timmermann et<br>al (2023) | DMT | Single-blind, placebo-<br>controlled, counter-<br>balanced design     | N=20<br>Female N=7  | 20mg  | IV   | Not naïve/<br>Handedness<br>not considered    |

**Notes:** <sup>a</sup>This manuscript includes both PET and fMRI analyses in its experimental design. LSD: lysergic acid diethylamide; DMT:

N,N-dimethyltryptamine; IV: intravenous; Mostly naïve: some participants had previous use of psychedelics, creating a mix of naïve and non-naïve individuals; Not naïve: participants had previous use of psychedelics, but not within three months of study date.
